# Supplementary material for: Artificial intelligence predicts clinically relevant atrial high-rate episodes in patients with cardiac implantable electronic devices
Source: PubMed Central journal article supplement (PMC8741914; doi:10.1038/s41598-021-03914-4), 2022-01-07

**Supplementary Table 1.** Correlation indices measured for correlation–based selection.

| Discrete variables*                 |             | Continuous variables†             |             |
|-------------------------------------|-------------|-----------------------------------|-------------|
| Variables                           | Correlation | Variables                         | Correlation |
| Pacemaker indication                | 0.147       | QRS duration                      | 0.075       |
| Beta adrenergic receptor blockers   | 0.124       | Age                               | 0.044       |
| >1% APC on Holter, pre-implantation | 0.104       | LA diameter                       | 0.041       |
| Dyslipidemia                        | 0.056       | Baseline systolic blood pressure  | 0.040       |
| Prior stroke/TIA                    | 0.050       | QTc interval                      | 0.039       |
| ARB/ACEi                            | 0.044       | Body mass index                   | 0.021       |
| Diabetes                            | 0.042       | LVEF                              | 0.010       |
| >1% VPC on Holter, pre-implantation | 0.038       | Baseline diastolic blood pressure | 0.008       |
| Statin                              | 0.037       | Baseline eGFR                     | 0.002       |
| Vascular disease                    | 0.030       | Baseline heart rate               | 0.002       |
| Calcium channel blocker             | 0.015       |                                   |             |
| Sex                                 | 0.011       |                                   |             |
| Hypertension                        | 0.011       |                                   |             |
| Smoking                             | 0.006       |                                   |             |
| Heart failure                       | 0.005       |                                   |             |
| Chronic kidney disease              | <0.001      |                                   |             |
| Alcohol                             | <0.001      |                                   |             |
| Diuretics                           | <0.001      |                                   |             |

Abbreviations: ACEi, angiotensin-converting-enzyme inhibitor; APC, atrial premature complex; ARB, angiotensin receptor blocker; GFR, glomerular filtration rate; LA, left atrium; LVEF, left ventricular ejection fraction; QTc, corrected QT; TIA, transient ischemic attack; VPC, ventricular premature complex

\* Cramér's V was applied for discrete variables.

† Point-biserial correlation coefficient was applied for continuous variables

**Supplementary Table 2.** Description of the selected variables for the predictive model

| Type of variables    | Description                                                                                                                                           |
|----------------------|-------------------------------------------------------------------------------------------------------------------------------------------------------|
| Continuous variables | QRS duration,<br>Age,<br>LA diameter,<br>Baseline systolic blood pressure                                                                             |
| Discrete variables   | Pacemaker indication,<br>Beta adrenergic receptor blockers,<br>>1% APC on holter, pre-implantation,<br>Dyslipidemia,<br>Prior stroke/TIA,<br>Diabetes |

Abbreviation: APC, atrial premature contraction; LA, left atrium; TIA, transient ischemic attack

**Supplementary Table 3.** Baseline characteristics of the derivation and validation sets.

| <b>Variables</b>                                     | <b>Derivation set (n=567)</b> | <b>Validation set (n=154)</b> | <b>p-value</b> |
|------------------------------------------------------|-------------------------------|-------------------------------|----------------|
| <b>Demographic</b>                                   |                               |                               |                |
| Age, (years)                                         | 71 (66, 79)                   | 73 (65, 79)                   | 0.269          |
| Male, n (%)                                          | 228 (40.2)                    | 57 (37.0)                     | 0.531          |
| Body mass index, (kg/m <sup>2</sup> )                | 24.2 (22.0, 26.6)             | 24.5 (22.2, 26.0)             | 0.589          |
| Smoking, n (%)                                       |                               |                               |                |
| Former/Current                                       | 84 (14.8)                     | 6 (3.9)                       | <0.001         |
| Alcohol, n (%)                                       | 89 (15.7)                     | 4 (2.6)                       | <0.001         |
| Former/Current                                       |                               |                               |                |
| <b>Clinical</b>                                      |                               |                               |                |
| Heart failure, n (%)                                 | 19 (3.4)                      | 7 (4.6)                       | 0.645          |
| Hypertension, n (%)                                  | 384 (67.7)                    | 100 (64.9)                    | 0.578          |
| Diabetes, n (%)                                      | 154 (27.2)                    | 42 (27.3)                     | 1.000          |
| Prior stroke/TIA, n (%)                              | 65 (11.5)                     | 15 (9.7)                      | 0.646          |
| Vascular disease, n (%)                              | 50 (8.8)                      | 21 (13.6)                     | 0.104          |
| Dyslipidemia, n (%)                                  | 205 (36.2)                    | 17 (11.0)                     | <0.001         |
| Chronic kidney disease, n (%)                        | 50 (8.8)                      | 9 (5.8)                       | 0.304          |
| <b>CHA<sub>2</sub>DS<sub>2</sub>VAS score*</b>       | 3 (2, 4)                      | 3 (2, 4)                      | 0.259          |
| <b>CHA<sub>2</sub>DS<sub>2</sub>VAS score, group</b> |                               |                               | 0.396          |
| 0, n (%)                                             | 16 (2.8)                      | 5 (3.2)                       |                |
| 1, n (%)                                             | 87 (15.3)                     | 17 (11.0)                     |                |
| ≥ 2, n (%)                                           | 464 (81.8)                    | 132 (85.7)                    |                |
| Pacemaker indication                                 |                               |                               | 0.071          |
| Sick sinus syndrome, n (%)                           | 235 (41.4)                    | 77 (50.0)                     |                |
| AV block, n (%)                                      | 332 (58.6)                    | 77 (50.0)                     |                |
| Baseline systolic blood pressure, (mmHg)             | 135 (122, 142)                | 135 (121, 149)                | 0.199          |
| Baseline diastolic blood pressure, (mmHg)            | 70 (63, 79)                   | 72 (64, 81)                   | 0.020          |
| Baseline heart rate, (/min)                          | 60 (46, 70)                   | 60 (53, 73)                   | 0.123          |
| Baseline eGFR, (mL/min/1.73 m <sup>2</sup> )         | 73.0 (60.3, 86.0)             | 78.0 (63.0, 94.0)             | 0.011          |
| <b>Electrocardiogram</b>                             |                               |                               |                |
| QRS duration, (ms)                                   | 98 (84, 128)                  | 110 (90, 146)                 | <0.001         |
| QTc interval, (ms)                                   | 439 (411, 467)                | 460 (427, 491)                | <0.001         |
| <b>Echocardiography</b>                              |                               |                               |                |
| LA diameter, (mm)                                    | 42 (36, 46)                   | 40 (35, 45)                   | 0.009          |
| LVEF, (%)                                            | 63 (60, 68)                   | 66 (61, 70)                   | 0.001          |
| <b>Holter recording</b>                              |                               |                               |                |
| APC >1% at pre-implantation, n (%)                   | 73 (7.6)                      | 10 (6.5)                      | 0.775          |
| VPC >1% at pre-implantation, n (%)                   | 39 (6.9)                      | 10 (6.5)                      | 1.000          |
| <b>Medications</b>                                   |                               |                               |                |
| ARB/ACEi, n (%)                                      | 241 (42.5)                    | 71 (46.1)                     | 0.479          |
| Beta adrenergic receptor blocker, n (%)              | 87 (15.3)                     | 25 (16.2)                     | 0.885          |
| Calcium channel blocker, n (%)                       | 174 (30.7)                    | 50 (32.5)                     | 0.745          |
| Statin, n (%)                                        | 245 (43.2)                    | 61 (39.6)                     | 0.478          |
| Diuretics, n (%)                                     | 131 (23.1)                    | 31 (20.1)                     | 0.499          |

The data are presented as number (%), median [IQR]

Abbreviations: ACEi, angiotensin-converting-enzyme inhibitor; AHREs, atrial high-rate episodes; APC, atrial premature complex; ARB, angiotensin receptor blocker; AV, atrioventricular; GFR, glomerular filtration rate; LA, left atrium; LVEF, left ventricular ejection fraction; QTc, corrected QT; TIA, transient ischemic attack; VPC, ventricular premature complex

\*The CHA<sub>2</sub>DS<sub>2</sub>-VAS score is a measure of the risk of stroke in patients with atrial fibrillation, with scoring ranging from 0 to 9 and higher scores indicating greater risk. Congestive heart failure, hypertension, age 75 years or older (doubled), diabetes, stroke (doubled), vascular disease, age 65 to 74 years, sex category (female)

**Supplementary Figure 1. Discrimination between informative versus non-informative variables**

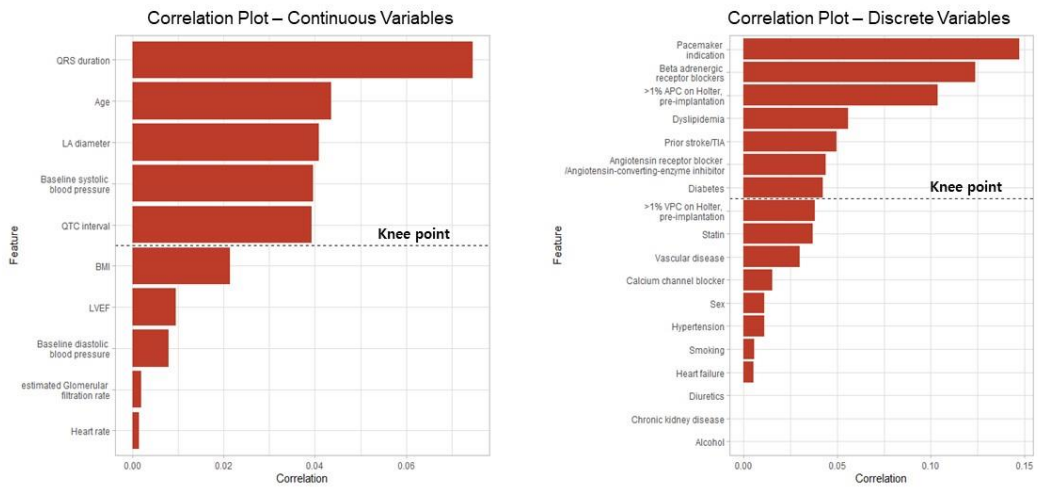

**Supplementary Figure 2.** RF model for predicting clinically relevant AHREs in patients with pacemaker

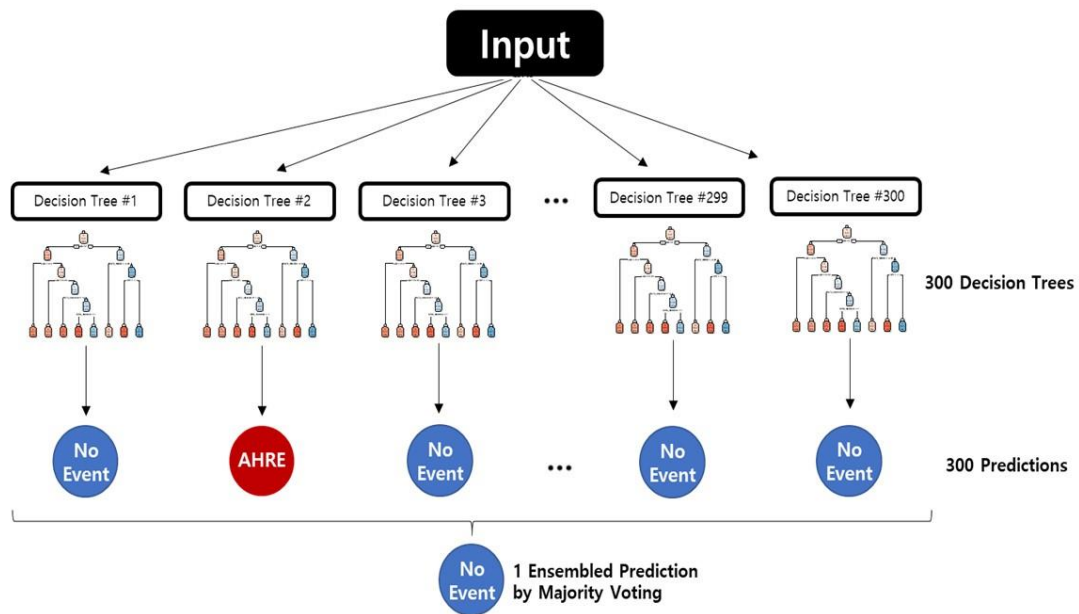

Supplement: 41598_2021_3914_MOESM1_ESM.pdf [file 41598_2021_3914_MOESM1_ESM.pdf]
